# Supplementary material
Source: PubMed Central journal article supplement (PMC3608742)
Supplement: NIHMS438293-supplement-1.pdf [file NIHMS438293-supplement-1.pdf]

# Supplemental Figure 1

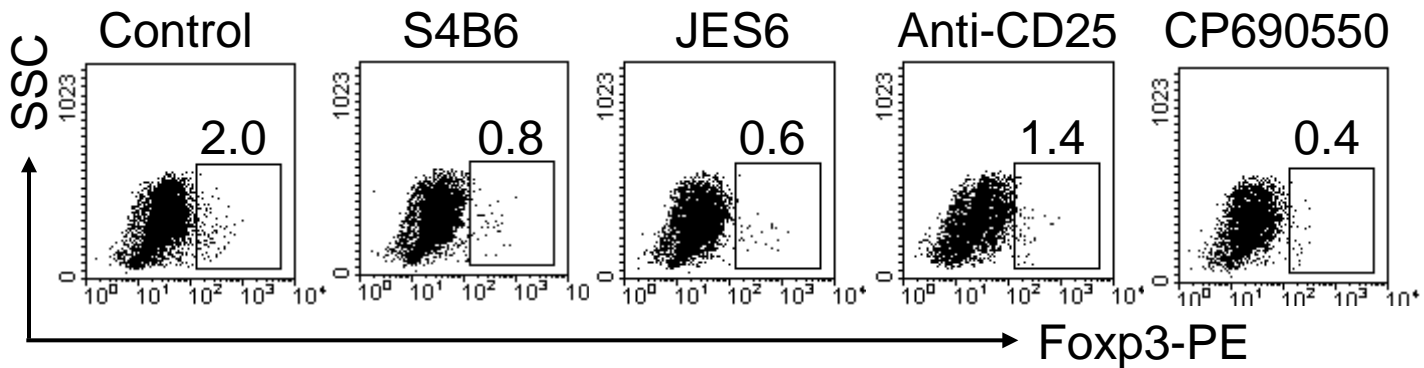

**Figure S1. *Fcpx3* was not expressed after the conditioning step.** Purified CD4<sup>+</sup>CD25<sup>-</sup> T cells were activated by anti-CD3/anti-CD28 mAbs in the presence of anti-IL-2 mAb (clone S4B6 or JES6, respectively), anti-CD25 mAb, or CP690550, as indicated. At 3 days after cell culture, cells were intracellularly stained with anti-Fcpx3-PE. The representative dot plots show the frequencies of Fcpx3-expressing cells.

## Supplemental Figure 2

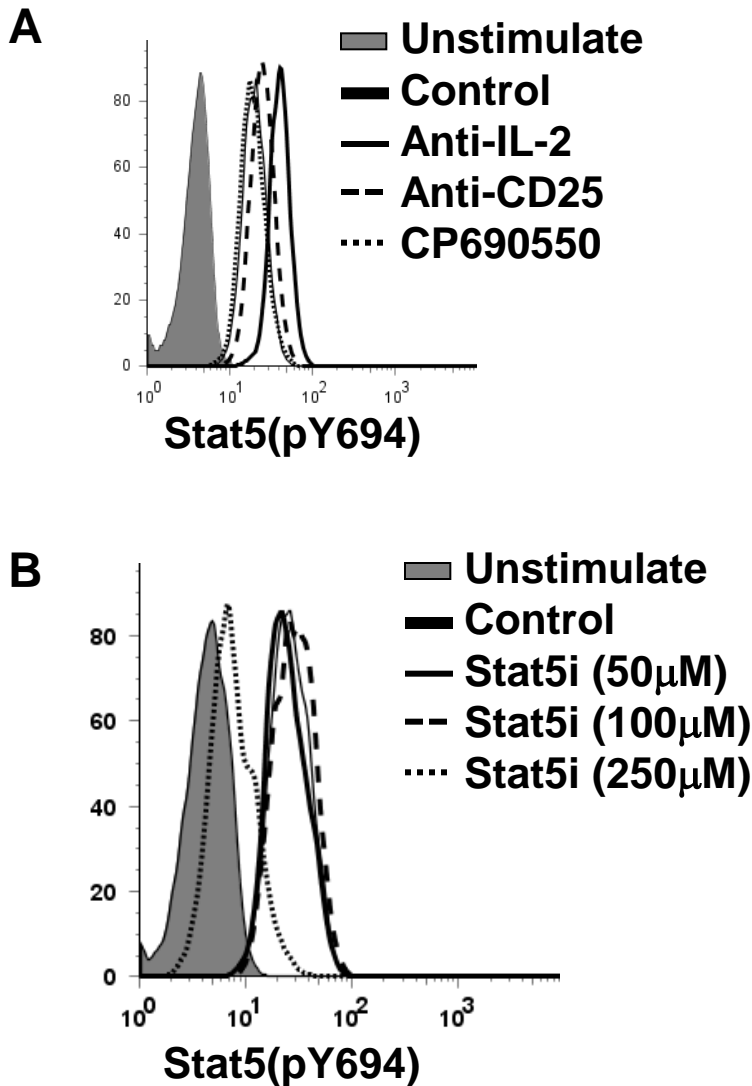

### **Figure S2. Stat5 phosphorylation during the two-step generation of iTreg cells.**

Purified CD4<sup>+</sup>CD25<sup>-</sup>Foxp3/GFP<sup>-</sup> T cells were used in the two-step model of iTreg cell generation. **(A)** During the conditioning step, cells were activated by anti-CD3/anti-CD28 mAbs for 3 days, and were either untreated (control group) or treated with 10  $\mu$ g/ml anti-IL-2 mAb, 10  $\mu$ g/ml anti-CD25 mAb, or 50 nM CP690550. Overlay histogram shows the phospho-Stat5 expression in the day-3 cultured cells. **(B)** During the conditioning step, cells were activated by anti-CD3/anti-CD28 mAbs for 3 days, and were either untreated (control group) or treated with the indicated concentrations of Stat5 inhibitor. Overlay histogram shows the phospho-Stat5 expression in the day-3 cultured cells.

# Supplemental Figure 3

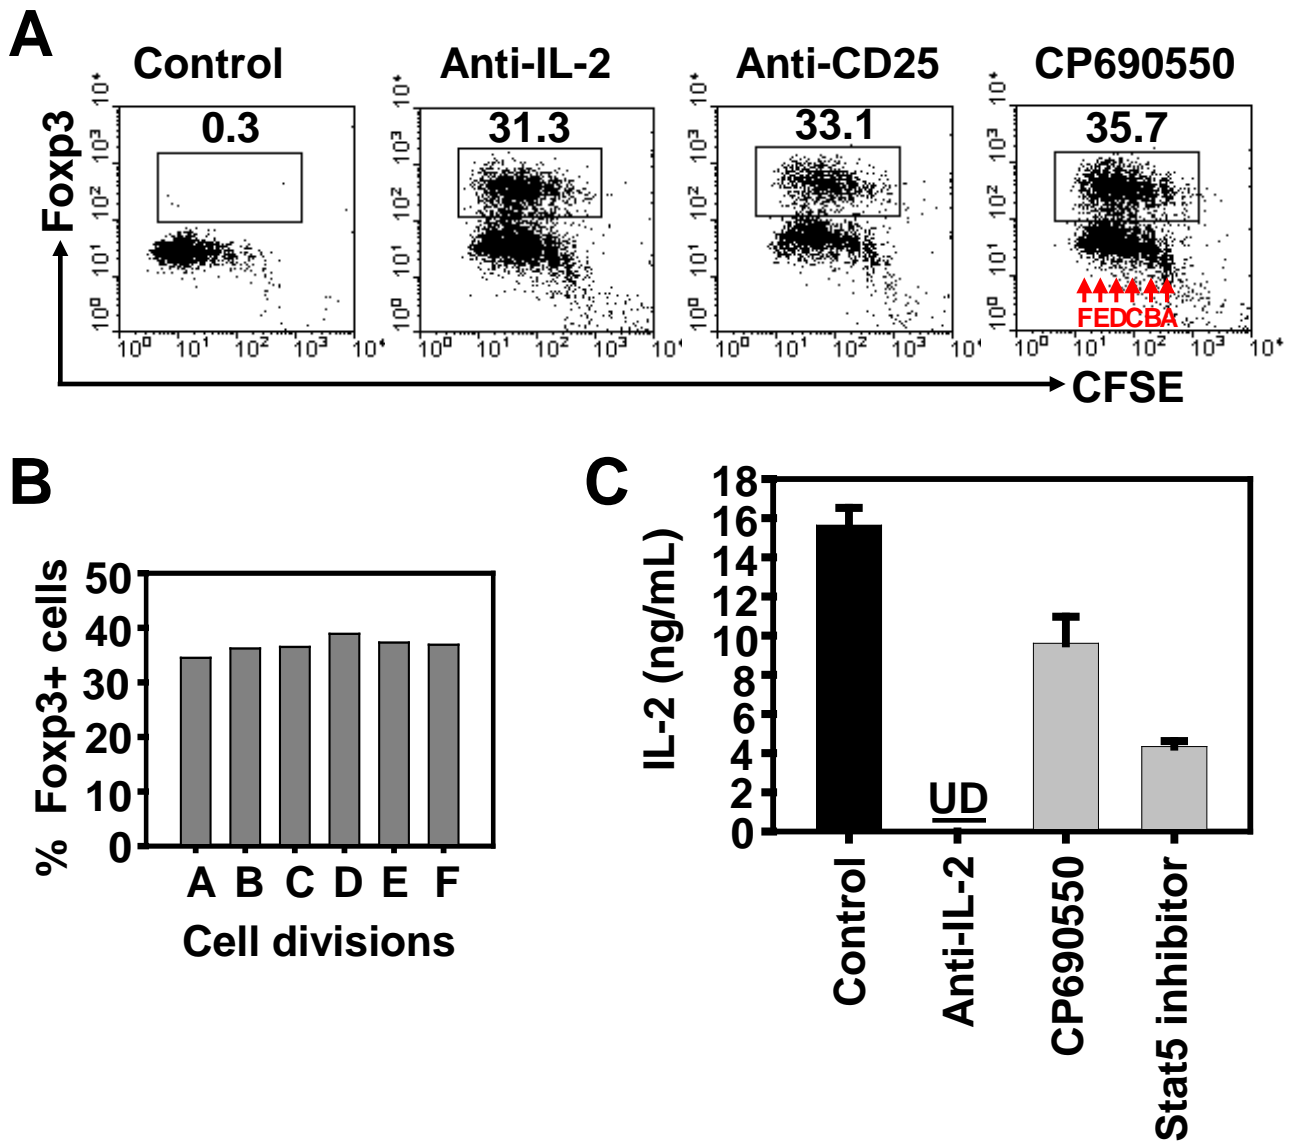

**Figure S3. (A and B) Proliferation and Foxp3 expression during the two-step generation of iTreg cells.** CD4<sup>+</sup>CD25<sup>-</sup> T cells were stimulated with anti-CD3/anti-CD28 mAbs for 3 days in the absence (control group) or presence of anti-IL-2 mAb, anti-CD25 mAb, or CP690550 for 3 days, followed by exposure to IL-2 for 3 days. Cells were analyzed on day 6 after culture. In A, CD4<sup>+</sup>CD25<sup>-</sup> T cells were CFSE labeled prior to cell culture. On day 6, cells were intracellularly stained with anti-Foxp3-PE. The frequencies of Foxp3-expressing cells are shown. In B, the bar graph shows the % Foxp3-expressing cells in each cell division, which is indicated by the red arrows in the right panel of A. (C) **IL-2 levels during the conditioning step of iTreg cell generation.** Purified CD4<sup>+</sup>CD25<sup>-</sup> cells were activated by anti-CD3/anti-CD28 mAbs in the absence (control) or presence of anti-IL-2 mAb, CP690550, or Stat5 inhibitor as indicated. At 3 days after cell culture, IL-2 levels in the supernatants of cultures were detected by ELISA.

# Supplemental Figure 4

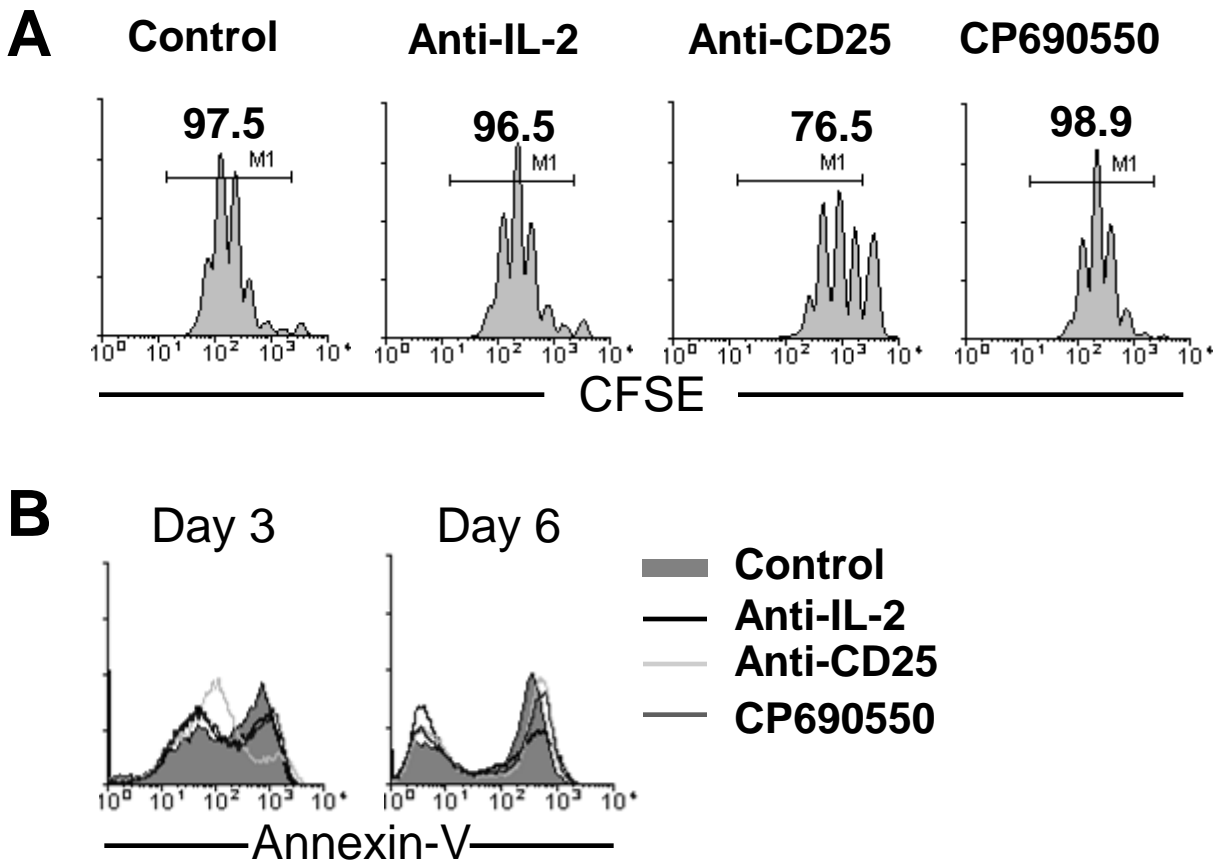

**Figure S4. Characterizing proliferation and survival of T cells during iTreg cell differentiation.** (A) CFSE-labeled CD4<sup>+</sup>CD25<sup>-</sup> T cells were activated by anti-CD3/anti-CD28 mAbs in the absence (control) or presence of 10 µg/ml anti-IL-2 mAb, 10 µg/ml anti-CD25 mAb, and 50 nM CP690550 as indicated. Histograms show the proliferation of CFSE-labeled cells in the day 3 cultures. (B) Purified CD4<sup>+</sup>CD25<sup>-</sup> T cells were activated by anti-CD3/anti-CD28 mAbs in the presence of anti-IL-2 mAb, anti-CD25 mAb, and CP690550 for 3 days (the conditioning step), followed by exposure to IL-2 for additional 3 days (the Foxp3-induction step). Overlay histograms show the expression of Annexin V in cells from day 3 or day 6 cultures.
